# Supplementary material for: Naringin Reduces Hyperglycemia-Induced Cardiac Fibrosis by Relieving Oxidative Stress
Source: PubMed Central journal article supplement (PMC4788433; doi:10.1371/journal.pone.0149890), 2016-03-11
Supplement: pone.0149890.s001.pdf [file pone.0149890.s001.pdf]

# S1

|                    | Day 0 |      |    | Day 56 |      |    |
|--------------------|-------|------|----|--------|------|----|
|                    |       |      | no |        |      | no |
| Control            | 4.09  | 0.18 | 7  | 5.34   | 0.25 | 7  |
| Control + Naringin | 4.13  | 0.19 | 7  | 4.97   | 0.41 | 7  |
| DM +INS            | 4.14  | 0.19 | 7  | 16.91  | 0.97 | 7  |
| DM + NRN           | 3.83  | 0.26 | 7  | 33.30  | 0.45 | 7  |
| DM                 | 3.93  | 0.17 | 7  | 34.61  | 0.76 | 7  |
| DM+RAMP            | 4.21  | 0.26 | 7  | 30.77  | 1.78 | 7  |
