# Supplementary material for: Naringin Reduces Hyperglycemia-Induced Cardiac Fibrosis by Relieving Oxidative Stress
Source: PubMed Central journal article supplement (PMC4788433; doi:10.1371/journal.pone.0149890), 2016-03-11
Supplement: pone.0149890.s002.pdf [file pone.0149890.s002.pdf]

## S2

### Water consumption-

| CTR  | NRN/Norm. | INS/DM | NRN/DM | DM     | DM/RAMP |
|------|-----------|--------|--------|--------|---------|
| 275. | 260.      | 1050.  | 1060.  | 1180.0 | 1140.   |
| 225. | 250.      | 1072.  | 820.   | 1070.0 | 850.    |
| 300. | 225.      | 1050.  | 1225.  | 1250.0 | 765.    |
| 314. | 240.      | 1250.  | 1095.  | 1170.0 | 920.    |
| 370. | 250.      | 1000.  | 1110.  | 1120.0 | 1090.   |
| 260. | 225.      | 1140.  | 1375.  | 1225.0 | 1075.   |
| 350. | 200.      | 1150.  | 1175.  | 1125.0 | 1000.   |
| 210. | 200.      | 1200.  | 1225.  | 1265.0 | 1075.   |
| 212. | 225.      | 1275.  | 1175.  | 1100.0 | 1000.   |
| 250. | 175.      | 1225.  | 1125.  | 1075.0 | 1120.   |
| 230. | 250.      | 1320.  | 1135.  | 1035.0 | 880.    |
| 225. | 200.      | 980.   | 1065.  | 1025.0 | 850.    |
| 235. | 185.      | 795.   | 1040.  | 1050.0 | 800.    |
| 150. | 125.      | 1345.  | 850.   | 650.0  | 750.    |
| 250. | 195.      | 1090.  | 1000.  | 945.0  | 800.    |
| 175. | 250.      | 1400.  | 900.   | 950.0  | 800.    |
| 350. | 275.      | 1365.  | 900.   | 860.0  | 865.    |
| 260. | 200.      | 1225.  | 775.   | 840.0  | 715.    |
| 205. | 250.      | 1135.  | 900.   | 715.0  | 565.    |
| 200. | 325.      | 1100.  | 875.   | 740.0  | 710.    |
| 175. | 215.      | 960.   | 900.   | 1050.0 | 700.    |
| 275. | 200.      | 860.   | 900.   | 1250.0 | 750.    |
| 175. | 190.      | 790.   | 975.   | 1025.0 | 585.    |
| 230. | 200.      | 840.   | 1010.  | 1330.0 | 545.    |
| 180. | 205.      | 735.   | 870.   | 1425.0 | 515.    |
| 210. | 175.      | 710.   | 915.   | 1450.0 | 425.    |
| 200. | 175.      | 625.   | 800.   | 1462.5 | 750.    |
| 305. | 315.      | 825.   | 800.   | 1350.0 | 520.    |
| 225. | 175.      | 700.   | 670.   | 1510.0 | 410.    |
| 225. | 200.      | 575.   | 700.   | 1500.0 | 575.    |
| 175. | 175.      | 775.   | 785.   | 1520.0 | 380.    |
| 205. | 160.      | 655.   | 730.   | 1430.0 | 480.    |
| 175. | 200.      | 725.   | 775.   | 1475.0 | 530.    |
| 200. | 225.      | 775.   | 585.   | 1415.0 | 450.    |
| 225. | 185.      | 790.   | 700.   | 1415.0 | 570.    |
| 135. | 220.      | 350.   | 475.   | 1590.0 | 400.    |
