# Supplementary material for: Naringin Reduces Hyperglycemia-Induced Cardiac Fibrosis by Relieving Oxidative Stress
Source: PubMed Central journal article supplement (PMC4788433; doi:10.1371/journal.pone.0149890), 2016-03-11
Supplement: pone.0149890.s003.pdf [file pone.0149890.s003.pdf]

Glucose Tolerance Test

| Control | Control+NRN | INS/DM | DM+NRN | DM    | DM+RAMP |
|---------|-------------|--------|--------|-------|---------|
| 791.3   | 984.8       | 3939.  | 3740.  | 3897. | 4034.   |
| 900.8   | 804.8       | 3788.  | 3962.  | 3952. | 4032.   |
| 861.0   | 972.8       | 3876.  | 3941.  | 3505. | 4043.   |
| 902.3   | 849.0       | 3917.  | 3877.  | 3459. | 4038.   |
| 859.5   | 1007.0      | 3870.  | 3414.  | 3717. | 4036.   |
| 1176.0  | 895.5       | 3835.  | 3401.  | 3789. | 3039.   |
|         | 951.0       | 3219.  | 3983.  |       |         |
