# Supplementary material for: Naringin Reduces Hyperglycemia-Induced Cardiac Fibrosis by Relieving Oxidative Stress
Source: PubMed Central journal article supplement (PMC4788433; doi:10.1371/journal.pone.0149890), 2016-03-11
Supplement: pone.0149890.s005.pdf [file pone.0149890.s005.pdf]

NADPH Oxidase activity

| CTR   | NRN+CTR | INS+DM | NRN+DM  | DM    | RMP+DM |
|-------|---------|--------|---------|-------|--------|
| 0.314 | 0.4760  | 0.286  | 0.91620 | 1.330 | 0.143  |
| 0.190 | 0.2100  | 0.048  | 0.83810 | 1.240 | 0.095  |
| 0.224 | 0.4500  | 0.143  | 1.31900 | 0.910 | 0.524  |
| 0.333 | 0.3620  | 0.076  | 0.73300 | 1.290 | 0.429  |
| 0.476 | 0.3500  | 0.238  | 0.84800 | 1.000 | 0.429  |
