# Supplementary material for: Naringin Reduces Hyperglycemia-Induced Cardiac Fibrosis by Relieving Oxidative Stress
Source: PubMed Central journal article supplement (PMC4788433; doi:10.1371/journal.pone.0149890), 2016-03-11
Supplement: pone.0149890.s006.pdf [file pone.0149890.s006.pdf]

CuZnSOD  
activity

| CTR      | NRN      | INS      | NRN/DM    | DM        | RMP/DM    |
|----------|----------|----------|-----------|-----------|-----------|
| 1.125929 | 1.736223 | 1.367032 | 0.7002298 | 0.2858327 | 0.3159707 |
| 1.864309 | 1.318058 | 1.272851 | 0.5457727 | 0.2029533 | 0.229324  |
| 1.807800 | 1.355731 | 1.174903 | 0.5909797 | 0.3385742 | 0.5231692 |
| 1.099558 | 1.706084 | 1.687248 | 0.7039971 | 0.1577464 | 0.1652808 |
| 1.054351 | 1.416007 | 1.092023 | 1.084489  | 0.2933672 | 0.4666606 |
|          |          | 1.717386 |           | 0.5269365 | 0.2519275 |
|          |          |          |           | 0.6550228 |           |
